# Supplementary material for: A pumpless cell culture chip with the constant medium perfusion-rate maintained by balanced droplet dispensing
Source: Royal Society of Chemistry journal article supplement (doi:10.1039/c1lc20234k), 2011-01-01
Supplement: c1lc20234k.pdf [file c1lc20234k.pdf]

## Supplementary Information

# A pumpless cell culture chip with the constant medium perfusion-rate maintained by balanced droplet dispensing

Taeyoon Kim and Young-Ho Cho

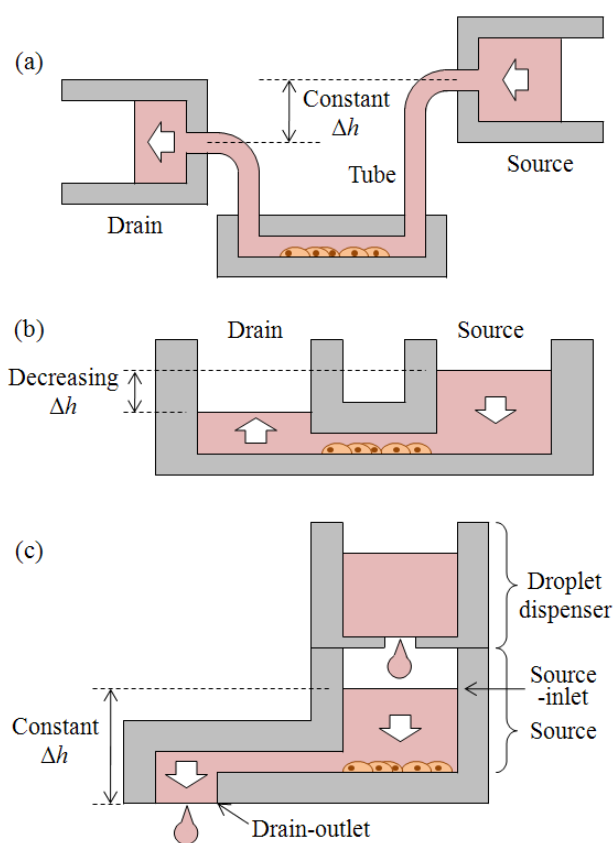

**Fig. S1** Comparison of the pumpless perfusion methods: (a) the previous method with horizontally-oriented reservoirs, resulting in low-integrability and high dead-volume due to the external reservoirs interconnected by tubes; (b) the previous method with vertical reservoirs, resulting in the decreasing perfusion flow-rate due to the gradually decreasing  $\Delta h$ ; (c) the present method with droplet dispensers integrated on the vertical reservoirs, performing the constant flow-rate perfusion due to the constant  $\Delta h$  maintained by the balanced droplet dispensing between source-inlet and drain-outlet.

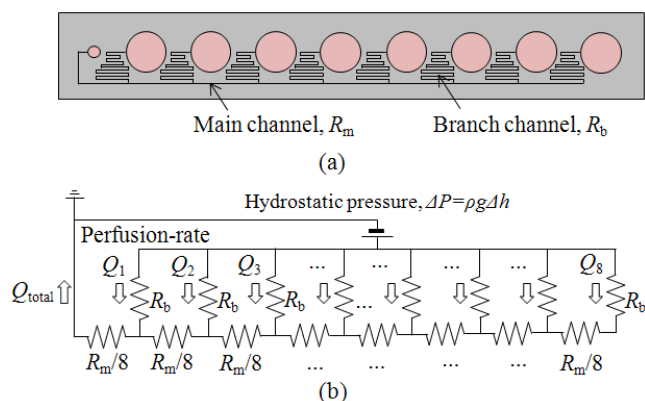

**Fig. S2** Theoretical estimation of the flow-rates in the drain channel: (a) the enlarged view of the drain channel; (b) the equivalent electrical circuit model of the drain channels in (a).

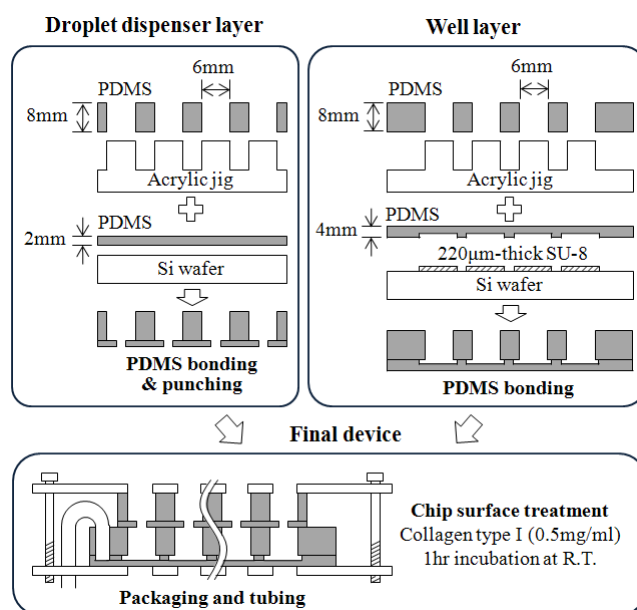

**Fig. S3** Fabrication process for the pumpless perfusion cell culture chip.
